# Supplementary material
Source: Springer Nature journal article supplement (https://www.springermedizin.de/resource/supplementary/12885_2012_3773_MOESM1_ESM.pdf/9464410)

A

Benign

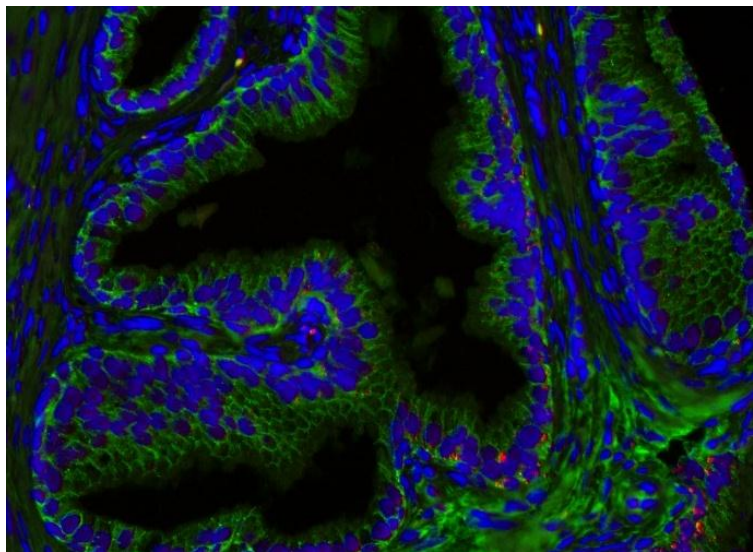

B

Benign

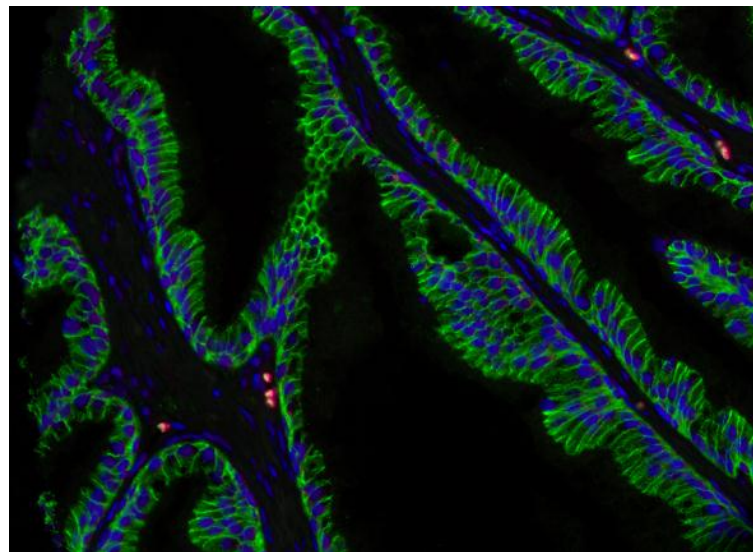

C

Cancer (Gleason 3+3=6)

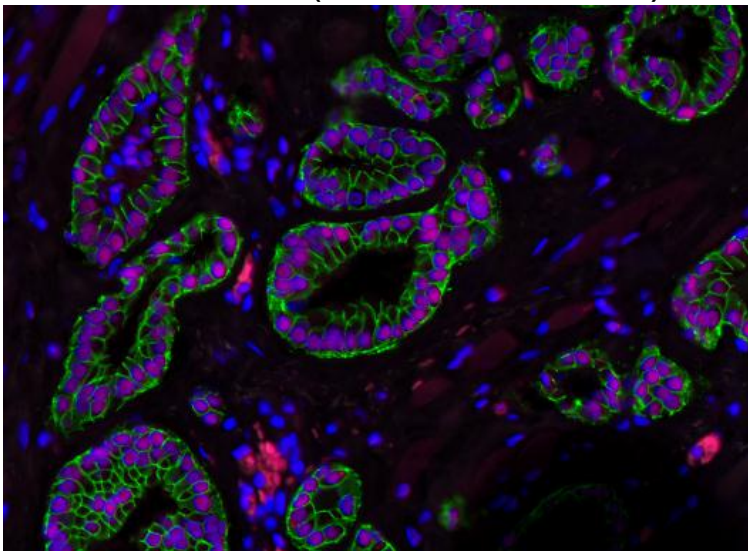

D

Cancer (Gleason 4+4=8)

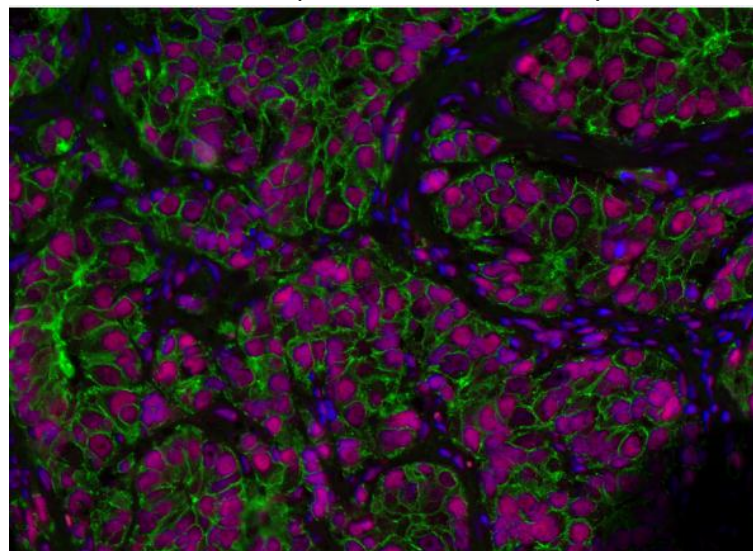

Supplement: MOESM1 [file 9464410]
